# Supplementary material for: Simultaneous Removal of Arsenic and Manganese from Synthetic Aqueous Solutions Using Polymer Gel Composites
Source: MDPI journal article supplement (doi:10.3390/nano11041032), 2021-04-18
Supplement: s1 [file s1]

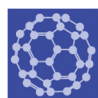

## Supporting Information

# Simultaneous Removal of Arsenic and Manganese from Synthetic Aqueous Solutions Using Polymer Gel Composites

Syed Ragib Safi and Takehiko Gotoh \*

Department of Chemical Engineering, Hiroshima University, 1-4-1 Kagamiyama, Higashi Hiroshima, Hiroshima 739-8527, Japan; d196289@hiroshima-u.ac.jp

\* Correspondence: tgoto@hiroshima-u.ac.jp; Tel.: +81-82-424-7720

Table S1. FTIR spectroscopy peak analysis.

| Wave<br>length<br>h | DMAAAQ<br>+ FeOOH | DMAAAQ<br>+ FeOOH +<br>Mn | DMAAAQ<br>+ Mn | γ-<br>FeOOH | γ-<br>FeOOH<br>+ Mn | Group               | Com-<br>pound<br>Class       | Appear-<br>ance  |
|---------------------|-------------------|---------------------------|----------------|-------------|---------------------|---------------------|------------------------------|------------------|
| 1209                |                   |                           |                |             |                     | C-N<br>stretching   | amine                        | medium           |
| 1211                |                   |                           |                |             |                     |                     |                              |                  |
| 1458                |                   |                           |                |             |                     | C-H bend-<br>ing    | alkane                       | medium           |
| 1508                |                   |                           |                |             |                     | N-O<br>stretching   | nitro<br>com-<br>pound       | strong           |
| 1541                |                   |                           |                |             |                     |                     |                              |                  |
| 1693                |                   |                           |                |             |                     | C=O<br>stretching   | primary<br>amide             | strong           |
| 1753                |                   |                           |                |             |                     | C=O<br>stretching   | carbox-<br>ylic acid         | strong           |
| 1764                |                   |                           |                |             |                     | C=O<br>stretching   | vi-<br>nyl/phe-<br>nyl ester | strong           |
| 1774                |                   |                           |                |             |                     |                     |                              |                  |
| 2139                |                   |                           |                |             |                     | C≡C<br>Stretching   | alkyne                       | weak             |
| 2347                |                   |                           |                |             |                     | O=C=O<br>stretching | carbon<br>dioxide            | strong           |
| 2387                |                   |                           |                |             |                     |                     |                              |                  |
| 2954                |                   |                           |                |             |                     | N-H<br>stretching   | amine<br>salt                | strong,<br>broad |
| 2956                |                   |                           |                |             |                     |                     |                              |                  |
| 3047                |                   |                           |                |             |                     | C-H<br>stretching   | alkane                       | medium           |
| 3051                |                   |                           |                |             |                     |                     |                              |                  |
| 3234                |                   |                           |                |             |                     | O-H<br>stretching   | alcohol                      | strong,<br>broad |
| 3255                |                   |                           |                |             |                     |                     |                              |                  |
| 3273                |                   |                           |                |             |                     |                     |                              |                  |
| 3275                |                   |                           |                |             |                     |                     |                              |                  |
| 3294                |                   |                           |                |             |                     |                     |                              |                  |
| 3296                |                   |                           |                |             |                     |                     |                              |                  |

|      |  |  |  |  |                |                          |                |
|------|--|--|--|--|----------------|--------------------------|----------------|
| 3311 |  |  |  |  | N-H stretching | second-ary amine         | medium         |
| 3329 |  |  |  |  |                |                          |                |
| 3331 |  |  |  |  |                |                          |                |
| 3346 |  |  |  |  |                |                          |                |
| 3348 |  |  |  |  |                |                          |                |
| 3365 |  |  |  |  | N-H stretching | ali-phatic primary amine | medium         |
| 3367 |  |  |  |  |                |                          |                |
| 3369 |  |  |  |  |                |                          |                |
| 3373 |  |  |  |  |                |                          |                |
| 3385 |  |  |  |  |                |                          |                |
| 3387 |  |  |  |  |                |                          |                |
| 3390 |  |  |  |  |                |                          |                |
| 3404 |  |  |  |  | N-H stretching | primary amine            | medium         |
| 3412 |  |  |  |  |                |                          |                |
| 3415 |  |  |  |  |                |                          |                |
| 3423 |  |  |  |  |                |                          |                |
| 3433 |  |  |  |  |                |                          |                |
| 3435 |  |  |  |  |                |                          |                |
| 3442 |  |  |  |  |                |                          |                |
| 3448 |  |  |  |  |                |                          |                |
| 3456 |  |  |  |  |                |                          |                |
| 3458 |  |  |  |  |                |                          |                |
| 3464 |  |  |  |  |                |                          |                |
| 3469 |  |  |  |  |                |                          |                |
| 3473 |  |  |  |  |                |                          |                |
| 3475 |  |  |  |  |                |                          |                |
| 3481 |  |  |  |  |                |                          |                |
| 3483 |  |  |  |  |                |                          |                |
| 3489 |  |  |  |  |                |                          |                |
| 3500 |  |  |  |  |                |                          |                |
| 3504 |  |  |  |  |                |                          |                |
| 3523 |  |  |  |  |                |                          |                |
| 3535 |  |  |  |  |                |                          |                |
| 3539 |  |  |  |  |                |                          |                |
| 3547 |  |  |  |  |                |                          |                |
| 3618 |  |  |  |  | O-H stretching | alcohol                  | me-dium, sharp |
| 3620 |  |  |  |  |                |                          |                |
| 3641 |  |  |  |  |                |                          |                |
| 3649 |  |  |  |  |                |                          |                |
| 3651 |  |  |  |  |                |                          |                |
| 3660 |  |  |  |  |                |                          |                |
| 3668 |  |  |  |  |                |                          |                |
| 3674 |  |  |  |  |                |                          |                |

3676  
3678

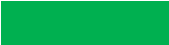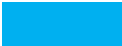

Table S2. Composition of gel composite.

|             | Chemical                             | Quantity (mol/m <sup>3</sup> ) |
|-------------|--------------------------------------|--------------------------------|
| Monomer     | DMAPAAQ, DMAA                        | 500                            |
| Crosslinker | MBAA                                 | 50                             |
| Accelerator | Sodium Sulfite                       | 80                             |
|             | Sodium Hydroxide (NaOH)              | 2100                           |
| Initiator   | Ammonium peroxodisulfate (APS)       | 30                             |
|             | Ferric Chloride (FeCl <sub>3</sub> ) | 700                            |

Table S3. Composition of gel.

| .           | Chemical                       | Quantity (mol/m <sup>3</sup> ) |
|-------------|--------------------------------|--------------------------------|
| Monomer     | DMAPAAQ, DMAA                  | 1000                           |
| Crosslinker | MBAA                           | 50                             |
| Accelerator | Sodium Sulfite                 | 20                             |
| Initiator   | Ammonium peroxodisulfate (APS) | 5                              |
